# Supplementary material for: A Corticothalamic Circuit Model for Sound Identification in Complex Scenes
Source: PLoS One. 2011 Sep 13;6(9):e24270. doi: 10.1371/journal.pone.0024270 (PMC3172241; doi:10.1371/journal.pone.0024270)
Supplement: Text S1 — Definition of auditory scene. (DOC) [file pone.0024270.s007.doc]

**Text S1: Definition of auditory scene**

We consider that the auditory scene is defined by its power spectrum at time *t*, represented by an *f*-dimensional vector. This vector is assumed to arise from a linear combination of *n* dictionary elements. At time, the sceneis composed of the dictionary elements according to the proportions given by the time-varying coefficients , such that we can write

S1. 1

The random variables are assumed to be uncorrelated to each other,

S1. 2

Here, the brackets <> indicate averages over time.

We can write as an *f*-dimensional column vector and combine the into an *n*-dimensional column vector as

S1. 3

S1. 4

Each can also be written as an *f*-dimensional column vector:

S1. 5

If we combine all the individual vectors into an *f* by *n* matrix:

S1. 6

the signal can be expressed as the matrix multiplication

S1. 7

Although the dictionary **B** has *n* vectors, any particular auditory scene is assumed to be generated by linear combinations of only a small set of the dictionary elements, that is, most of the time averages are zero.
