# Supplementary material for: A Corticothalamic Circuit Model for Sound Identification in Complex Scenes
Source: PLoS One. 2011 Sep 13;6(9):e24270. doi: 10.1371/journal.pone.0024270 (PMC3172241; doi:10.1371/journal.pone.0024270)
Supplement: Text S4 — Effects of auditory scene complexity and dictionary size on CPA performance. (DOC) [file pone.0024270.s010.doc]

**Text S4: Effects of auditory scene complexity and dictionary size on CPA performance**

CPA outputs parameters if an element was part of an auditory scene and outputs if it was not part of that auditory scene. The solutions are exact under the assumption that the scalar products between the dictionary elements that were present in a particular auditory scene were zero, that is:

, S4. 1

if

**. S4. 2**

The maximal number *n* of dictionary elements, such as that they are mutually orthogonal, is *f*, the number of dimensions of the input vectors. It is possible to have a much larger dictionary of *n* (*n>>f*) elements, if the values of the estimated parameters were robust against the dot products having small values . In this section, we will show that, if the number of dimensions *f* is large enough, the dictionary elements will be approximately orthogonal and the algorithm is still valid.

We start by perturbing the solution of section **Text S3** by adding small deviations that converge to zero for:

, if , S4. 3

and

, if S4. 4

These small parameters measure the deviation of the estimated parameters from the unperturbed solution, when . The purpose of the following derivation is to express the perturbation factors and in terms of .

Inserting **S4.3** and **S4.4** into **S3.23** and again separating into active and inactive indices, we get two equations. For inactive indices, we find

S4. 5

Similarly, we can derive an equation for :

S4.6

A part of the left-hand side cancels out such that

S4. 7

Similarly as for the unperturbed case in **Text S3**, we will now construct a self-consistent solution of **S4.5** and **S4.7**. To this end, we will assume that the deviations are small,. Furthermore, we assume that the scalar products *c* are small enough such that

, S4. 8

where *p* denotes the number of active elements, or equivalently, we assume that the number of active elements is bounded. The notation *O( )* indicates the order of magnitude of a variable.

Using the assumption that , we can approximate

S4. 9

We can use this approximation to simplify **S4.7** to obtain

S4. 10

The left side of **S4.10** is canceled out as

S4. 11

The elements of the sums in the first term are , the square of the dot products, whereas the elements of the sums in the second term are , making the elements of the second term much smaller than the elements of the first term. Therefore, we can approximate as

**S4. 12**

The order of magnitude is estimated according to the central limit theorem, yielding:

**S4. 13**

We can apply the same assumptions to equation **S4.5** for the inactive index set. Applying **S4.9**, we get

**S4. 14**

By canceling out the left-side term, we obtain

**S4. 15**

We can separate from the summations the terms that depend on *k=l* as

**S4. 16**

Again, the order of magnitude is estimated according to the central limit theorem, yielding:

**S4. 17**

A condition that the number *n* of dictionary elements is large enough, and that the auditory scenes are composed of a few elements *p*, would imply:

**S4. 18**

Therefore

, **S4. 19**

and **S4.17** becomes

**S4. 20**

We can conclude then that

**S4. 21**

If we replace **S4.21** in **S4.13**, we obtain

**S4. 22**

The dependency on n *on* the second term cancels out, and we obtain

**S4. 23**

We will now derive an expression for the dot product as a function of the length *f* of the input signal. In what follows, we assume that the entries of the dictionary elements are statistically independent random variables with zero mean. The scalar product can be treated by the central limit theorem, meaning that the expected value is:

**S4. 24**

and the variance is given by:

. **S4. 25**

This expression depends on the variance of the dictionary elements. Since the dictionary elements are normalized, that is,

, **S4. 26**

we can calculate the variance of the individual elements by:

. **S4. 27**

Therefore,

**S4. 28**

By placing this expression into **S4.25**, we obtain

**S4. 29**

We therefore approximate the distribution of the dot products *c* as the Gaussian distribution of zero mean and standard deviation. Therefore, we can estimate the order of the deviations as

**S4. 30**

Equations **S4.21** and **S4.30** state thatCPA is robust to deviations from orthogonality of the dictionary elements (see **Fig. 5A** for a simulation example for a signal of 400 dimensions and 68000 dictionary elements). Equation **S4.30** states that the deviations from the exact solution for the elements that took part in the auditory scene are small, if the number of dimensions *f* is large enough (see **Fig. 5D** for simulation results). The deviations also increase as the number of elements present in a scene *p* increases (see **Fig. 5C**).

Note that the derivation of this formula assumed that the distribution ofhas zero mean and therefore the order of magnitude of the sums in **S4.13** and **S4.17** scales like. If we assume a slight bias of, then the order of magnitude ofwill increase with *n* (see **Fig. 5B**).
